# Supplementary material
Source: PubMed Central journal article supplement (PMC7007569)
Supplement: pnas.1919567117.sapp.pdf [file pnas.1919567117.sapp.pdf]

## MATERIALS AND METHODS

### Bacterial strain and infection

*Neisseria meningitidis* (Nm) 2C4.3 strain, (formerly clone 12) that is a piliated capsulated Opa- Opc- variant of the serogroup C meningococcal clinical isolate 8013 and its isogenic non-piliated PilE defective mutant and that of non-adherent PilV defective mutant were described before (1). Bacterial strains were stored frozen at -80°C and routinely grown at 37°C under 5% CO<sub>2</sub> on GC agar plates (Difco) containing Kellogg's supplements. Kanamycin was added when required at a concentration of 100 µg/mL.

The day of infection, a suspension of the bacteria from an overnight culture on GCB agar plate was adjusted to OD<sub>600</sub>=0.05 and incubated for 2h at 37°C in a pre-warmed cell culture medium. Cells were infected with bacteria at a multiplicity of infection (MOI) of 100 bacteria per cell (OD= 0.1) for 30 minutes, washed twice to remove non-adherent bacteria and infection was allowed to proceed for various periods of time.

### Cell lines, plasmids and transfection

#### *Cell lines*

Human Cerebral Microvascular Endothelial Cells (hCMEC/D3) and Rat Brain Endothelial cells clone 4 (RBE4) are fully differentiated brain endothelial cell line derived from human and rat brain capillaries, respectively, engineered in our laboratory, and which recapitulate the major phenotypic features of the blood-brain barrier (2, 3). hCMEC/D3 were grown onto cultrex rat collagen type I-coated dishes (R&D) in Endothelial Cell Basal Medium-2 (Lonza) supplemented with 5% of FCS, 1.4 µM hydrocortisone (Lonza), 5 µg/mL ascorbic acid (Lonza), 1 ng/mL b-FGF (Lonza), at 37°C in 5% CO<sub>2</sub>. RBE4 were grown onto type I collagen-coated dishes in  $\alpha$ -medium/Ham's F-10 (1:1; Life Technologies), supplemented with 10% FBS, 1 ng/mL basic fibroblast growth factor (Sigma-Aldrich) and 300 µg/mL G418 (Sigma-Aldrich).

BEND3 are endothelioma derived from mice brain cortex purchased from ATCC® (CRL-2299™). Cells were cultured in Dulbecco's modified Eagle's medium (DMEM; Life Technologies) supplemented with 10% FBS.

HBMECs, a human bone marrow capillary endothelial cell line provided by Dr B. Weksler (4), were grown in DMEM Glucose 4.5g/L + Glutamax (Life Technologies) supplemented with 10% heat-inactivated fetal bovine serum FBS, 7.5 µg/mL endothelial cell growth supplement (Sigma-Aldrich), 7 UI heparin (Sigma-Aldrich) and 10 mM HEPES.

Primary Human Dermal Microvascular Endothelial Cells (HDMEC) isolated from the dermis of juvenile foreskin and adult skin (different locations) and their specific endothelial cell growth medium were purchased from PromoCell.

CHO-K1 cells stably expressing CD147 (CHO-hCD147) or the empty vector (CHO-pcDNA) as control were kindly provided by Dr Bukrinsky (the George Washington University, Washington, DC, USA) (5). CHO cells were cultured in DMEM/Nut-F12 (1/1, Life Technologies) supplemented with 5% FBS.

### *Plasmids*

The HA tag was introduced by PCR into pcDNA3-CD147 vector using the Phusion site directed mutagenesis kit (Finnzyme) as described (6). Deletion of the CD147 D1 and D2 domain and Asp to Ala mutations in the 3 different glycosylation sites were generated by PCR on the previous construction. All the constructs were confirmed by sequencing analysis. The primer sequences used in this work are provided in supplementary [Table S4](#).

### *Transfection*

HBMECs were transfected using the Amaxa Nucleofactor Kit V (Amaxa Biosystem) according to the manufacturer's instructions. Briefly, for optimal transfection of HBMECs,  $4 \cdot 10^6$  cells were suspended in 100 µL of solution V provided by Amaxa in the presence of 4 µg DNA, and subjected to electroporation using the program U15. Cells were then plated at the same density as cultures that

had reached confluency on Permanox coverslips (Costar) in complete medium for 24 hours before infection and fixation for confocal immunofluorescence analysis.

### **Pull Down assays and immunoblotting**

For pull down assays, transfected cells were lysed in lysis buffer containing 50 mM Tris-HCl pH 7.4, 150 mM NaCl 10% Glycerol, 1 mM CaCl<sub>2</sub>, 1 mM MgCl<sub>2</sub>, 5 mM NaF, 1% Triton. Cell lysates, or purified recombinant proteins, were incubated with agarose bound WGA lectin beads (Clinisciences, AL-1023S- 2) for 1 hour at 4°C. After 3 washes, beads were resuspended in Laemmli buffer and the presence of the proteins of interest was assessed by immunoblot analysis. Quantitative analyses were conducted on 3 independent experiments using ImageJ software.

### **Confocal immunofluorescence microscopy**

Cells were grown to confluence on Permanox coverslips (Thermo Fischer Scientific). After the indicated transfection, treatment and/or infection, cells were fixed and labeled with the appropriate antibodies. Image acquisitions were performed with a DMI6000 microscope (Leica, 63x). Image analysis were done with ImageJ software (NIH). Quantitative analysis of protein recruitment under bacterial colonies was determined as the proportion of colonies showing underlying proteins of interest. At least 30 colonies were observed per coverslip. Each experiment was repeated at least 3 times. The antibody dilutions/concentrations used in this work are provided in supplementary [Table S5](#).

### **Adhesion assays on living cells and immobilized recombinant proteins**

Meningococcal adhesion on hCMEC/D3 cells was assayed under static conditions, as previously described (7). When indicated, cells were preincubated with 20 µg/mL soluble lectin (Vector laboratories) or chitotriose (TCI-Europe). To inhibit protein sialylation, cells were treated for 3 weeks with the sialyltransferase inhibitor 3Fax-Peracetyl Neu5Ac (3Fax-P-Neu5a).

Meningococcal adhesion on cells was quantified as previously described, following a 30-min infection

in static conditions by plating dilutions on GCB agar (7). The number of colony forming units (CFU) was compared to that of the control strain in the same experiment. Experiments were performed at least three times in duplicate.

To perform adhesion assays on defucosylated cells, cells were treated for 1h with 0.08  $\mu$ /mL  $\alpha$ -L-fucosidase (F5884, SIGMA) or vehicle as control and washed gently with medium, before infection. As fucosidase treatment induced cell detachment, cells were fixed and labeled with antibodies targeting bacteria, CD147 and rhodamin-phalloidin to stain actin. Image acquisitions were performed with a DMI6000 microscope (Leica, 63x). Quantitative analysis were done with ImageJ software (NIH) and are presented as colonisation index corresponding to the area occupied by the fluorescently labelled bacteria in relation to cell area delineated by actin staining (n= 20 to 30 fields from 3 independent experiments).

For adhesion assays on immobilized recombinant proteins, experiments were performed as previously described (1). CD147-Fc and ALCAM-Fc were immobilized on Lab-Tek Chamber Slides 8 wells (#177455). When indicated, slides were preincubated with 20  $\mu$ g/mL soluble lectin. Briefly, slides were coated with poly-l-lysine (0.5  $\mu$ g/mL for 5 min RT), washed with PBS, cross-linked with glutaraldehyde (0.5% for 15 min RT), washed, incubated with anti-Fc (1  $\mu$ g/well) in assay buffer (PBS with 3% BSA) for 1 h RT, washed in assay buffer and incubated overnight at 4 °C with 1  $\mu$ g/well of recombinant protein at 4 °C overnight. Slides were washed in assay buffer for 1h RT, before infection for 30 min with meningococcal suspension of OD600 0.1. Slides were then washed three times with PBS, fixed with PFA 4% for 10 min and washed three times with PBS. Bacteria were labeled and visualized with a Leica DMI6000 microscope using a 63 $\times$  oil-immersion objective. The number of adherent bacteria per field was quantified for 30 fields using ImageJ software. To verify that the quantity of coated proteins was equal in each assay, the coated proteins were collected in Laemmli buffer in a control well and revealed by SDS-Page and immunoblot.

## **Protein treatments**

To perform enzymatic deglycosylation, 5 µg of CD147-Fc were incubated for 2h at 37°C with 1 µL of Rapid PNGase F (New England Biolabs, P0710S) in 20 µL (final volume) of PNGase F buffer (20 mM TRIS-HCl pH 8.0, 150 mM NaCl) before immobilization on different slides (1 µg/slide). To perform enzymatic desialylation, 5µg of CD147-Fc were incubated for 2h at 37°C with 1µL of α2-3,6,8,9 Neuraminidase A (New England Biolabs, P0722S) in 10 µL (final volume) of α2-3,6,8,9 Neuraminidase A buffer (20 mM Tris-HCl, pH 7.5, 1 mM EDTA, 50 mM NaCl). To perform enzymatic sialylation, 3µg of CD147-Fc or ALCAM-Fc were incubated for 2h at 37°C with 1 µL of sialyltransferase (Sigma-Aldrich-Merck, S1951-1UN) in 30 µL (final volume) of α-2,3-Sialyltransferase buffer (100 mM Tris-HCl buffer, pH 8.0, containing 1 mM CMP-Neu- 5-Ac (Sigma-Aldrich- Merck # C8271). To perform enzymatic defucosylation, 3 µg of CD147-Fc were incubated for 2h at 37°C with 2 µL α-1-2,3,4,6-L-Fucosidase (Megazyme, E-FUCHS) in 20 µL (final volume) of α-1- 2,3,4,6-L- Fucosidase buffer (100mM sodium acetate pH 4.0). As control for each treatment, 3 to 5 µg of recombinant proteins were similarly incubated in the corresponding enzymatic buffer alone, before immobilization on slides (1 µg/slide). For each experiment, one slide was lysed with lysis buffer and submitted to western blot analysis using anti-Fc antibody to verify the immobilization efficacy of the different modified recombinant proteins.

### **N-glycan analysis by mass spectrometry**

N-glycans were released by peptide-N-glycosidase F according to the manufacturer's instructions (New England Biolabs). Samples were purified using extract-clean SPE C18 columns (Grace Davison Discovery Sciences) activated with methanol and equilibrated in water. The flow through was lyophilised and the samples were permethylated for 2 hours in 200 µL DMSO, 10 mg NaOH and 300 µL ICH<sub>3</sub> under argon and strong shaking. The reaction was stopped with 1mL of 5% acetic acid and permethylated N-glycans were purified on a column Oasis HBL 6cc 200mg (Waters) activated in methanol and equilibrated in water. The column was washed with 5 % methanol and the samples were eluted in 100 % methanol. For enzymatic defucosylation, disulfide bridges were reduced by 10

mM DTT in 0.1M NH<sub>4</sub>HCO<sub>3</sub> at 56°C for 45 minutes and alkylated by 55mM iodacetamide in 0.1M NH<sub>4</sub>HCO<sub>3</sub> for 30 minutes in the dark. After dialysis against water using Slide-A-lyzer mini dialysis devices, samples were lyophilised and defucosylated enzymatically before PNGase F treatment. Permethylated N-glycans were analysed in the positive ion mode by MALDI-TOF-MS using an Ultraflex II (Bruker Daltonics). A total of 5 000 shots were accumulated per spectrum.

### Statistical analysis

Data were examined for significance using Prism GraphPad software. One-way ANOVA (Bonferroni's multiple comparison) were performed for multiple comparisons. Quantification of adhesion on cells was performed at least 2 times in triplicate. Quantification of adhesion to immobilized recombinant protein was performed from at least 3 independent experiments.

### SI APPENDIX REFERENCES

1. Bernard SC, *et al.* (2014) Pathogenic *Neisseria meningitidis* utilizes CD147 for vascular colonization. *Nature medicine* 20(7):725-731.
2. Durieu-Trautmann O, *et al.* (1993) Immortalized rat brain microvessel endothelial cells: II-- Pharmacological characterization. *Adv Exp Med Biol* 331:205-210.
3. Weksler BB, *et al.* (2005) Blood-brain barrier-specific properties of a human adult brain endothelial cell line. *Faseb J* 19(13):1872-1874.
4. Schweitzer KM, *et al.* (1997) Characterization of a newly established human bone marrow endothelial cell line: distinct adhesive properties for hematopoietic progenitors compared with human umbilical vein endothelial cells. *Lab Invest* 76(1):25-36.
5. Pushkarsky T, *et al.* (2001) CD147 facilitates HIV-1 infection by interacting with virus-associated cyclophilin A. *Proceedings of the National Academy of Sciences of the United States of America* 98(11):6360-6365.
6. Maissa N, *et al.* (2017) Strength of *Neisseria meningitidis* binding to endothelial cells requires highly-ordered CD147/beta2-adrenoceptor clusters assembled by alpha-actinin-4. *Nature communications* 8:15764.
7. Coureuil M, *et al.* (2010) *Meningococcus* Hijacks a beta2-adrenoceptor/beta-Arrestin pathway to cross brain microvasculature endothelium. *Cell* 143(7):1149-1160.

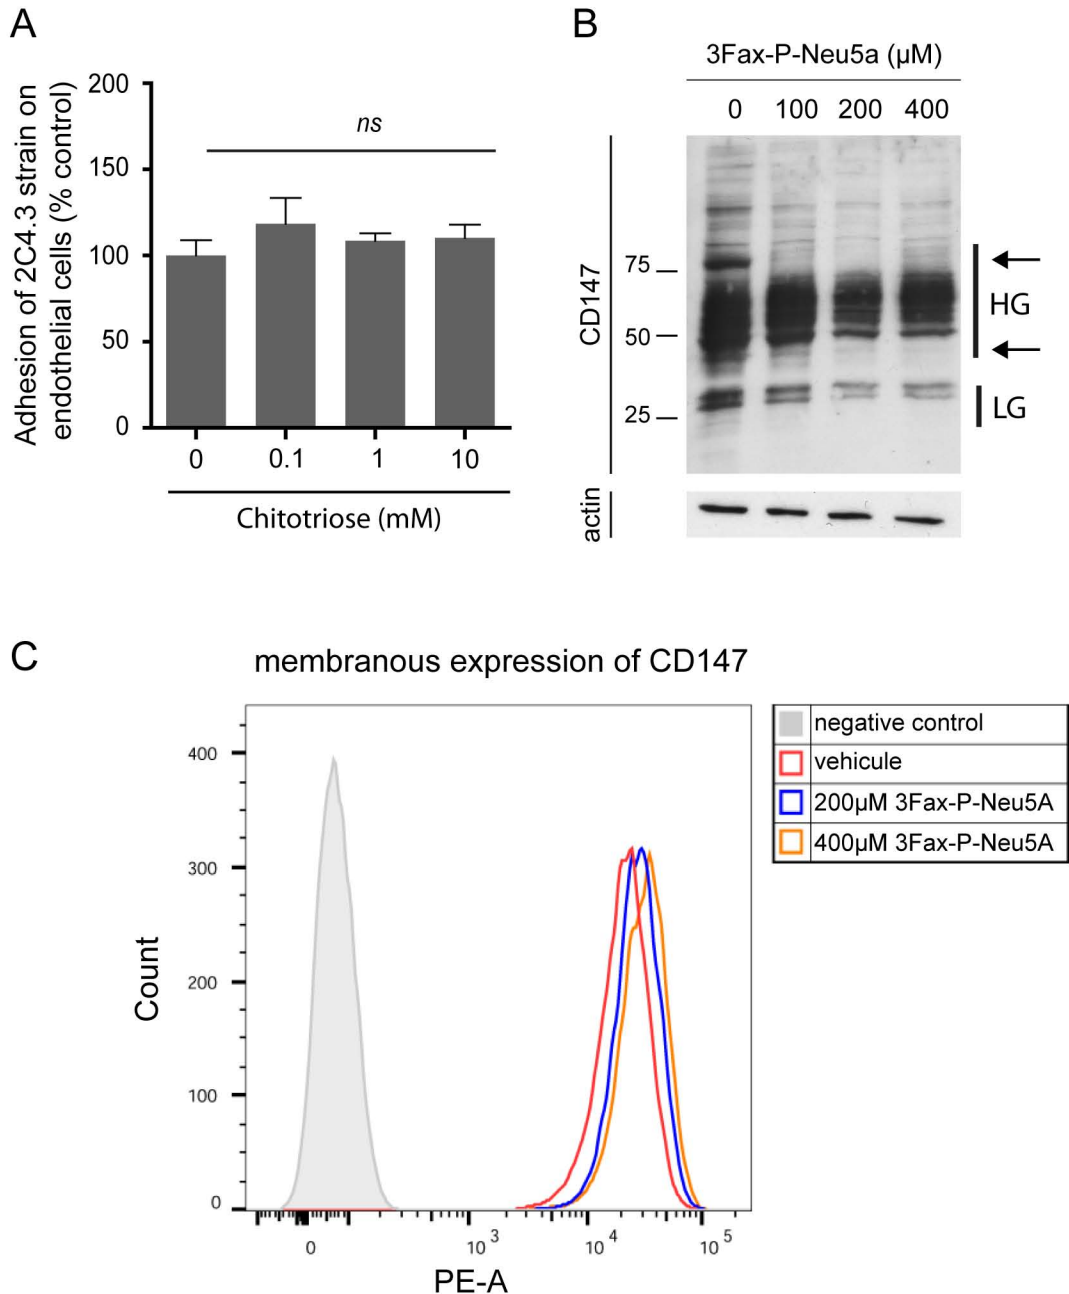

Figure S1

(A) Competing with GlcNAc does not affect bacterial adhesion. HCMEC/D3 cells were infected for 30 min in the presence of chitotriose, before determining CFU. Bars represent the percentage of bacterial adhesion in relation to the control condition (in the absence of chitotriose); ns: non significant; One-way ANOVA.

(B) Whole protein extracts were processed for SDS-Page and immunoblot analysis using anti-CD147 antibody. Brackets point to the highly glycosylated (HG) and the low glycosylated (LG) forms of CD147. Arrows point at the glycosylated forms of CD147 that disappear upon 3Fax-P-Neu5a treatment.

(C) HCMEC/D3 cells were treated for 3 weeks with varying concentrations of the sialyl transferase inhibitor 3Fax-P-Neu5Aa, or vehicle as a control, and the membranous expression of CD147 was assessed by flow cytometry using anti-hCD147 antibody (clone MEM-M6/6 from AbD Serotec).

Supplementary Figure S2

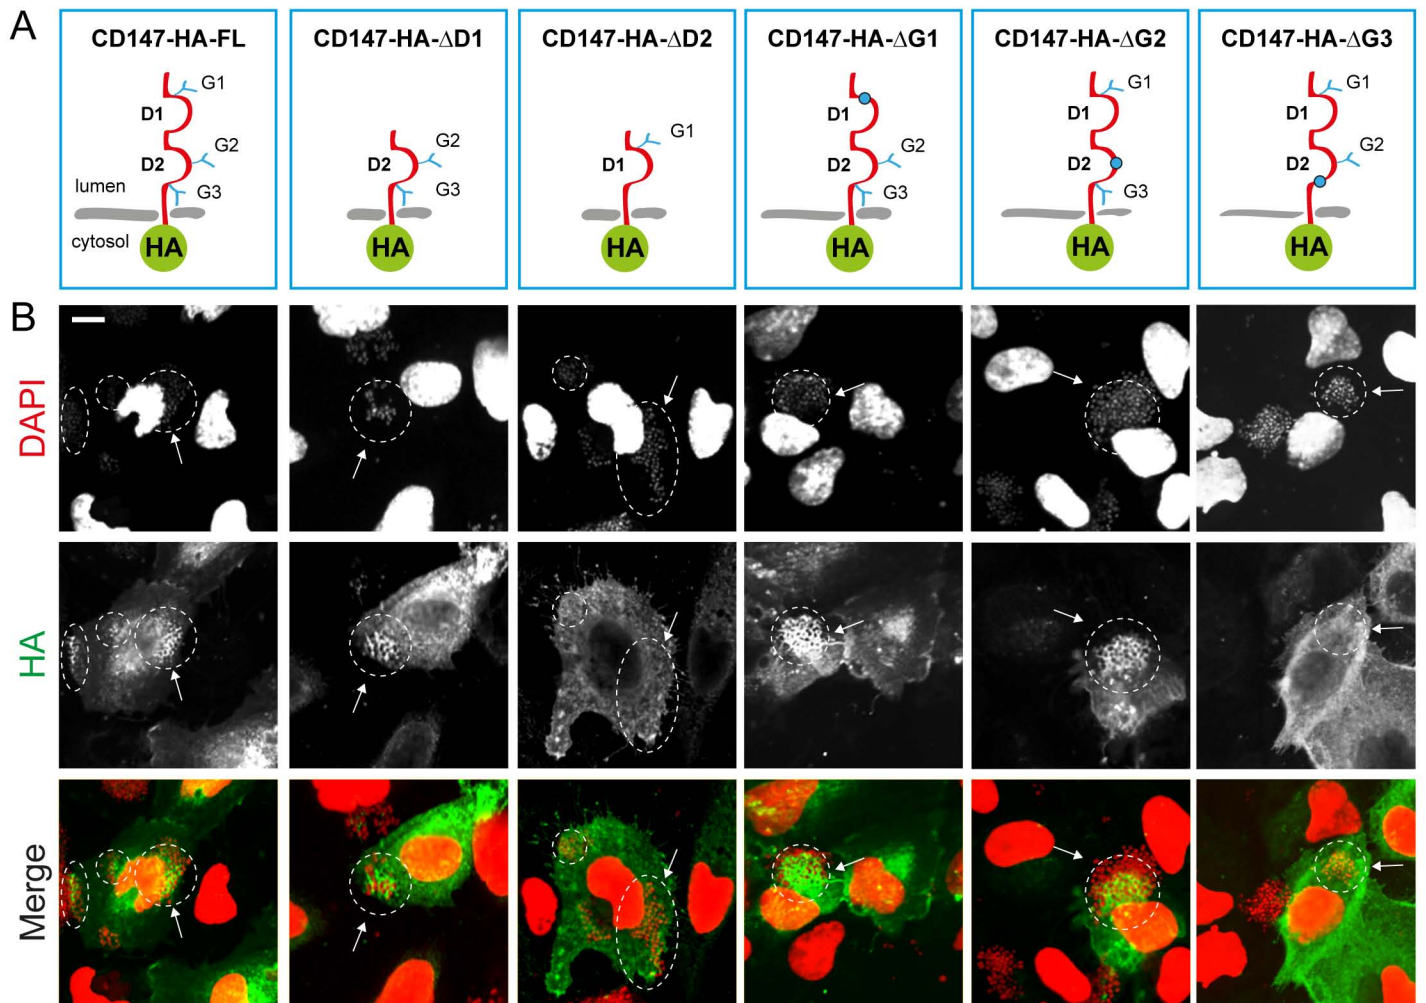

Figure S2:

(A) Schematic representation of the different engineered HA-tagged human CD147 constructs: full length (CD147-HA-FL), deleted of the distal Ig domain 1 (CD147-HA- $\Delta$ D1), deleted of the membrane proximal Ig domain 2 (CD147-HA- $\Delta$ D2), or lacking one of the three glycosylation sites by replacement of Asparagine 44, 152 or 186 to Alanine (CD147-HA- $\Delta$ G1,  $\Delta$ G2 or  $\Delta$ G3, respectively).

(B) HBMECs were transfected with the different constructs, infected with *N. meningitidis* 2C4.3 for 2h and processed for immunofluorescence staining with DAPI and anti-HA antibody before analysis by confocal microscopy. Scale bar: 10 $\mu$ m.



Supplementary Figure S3

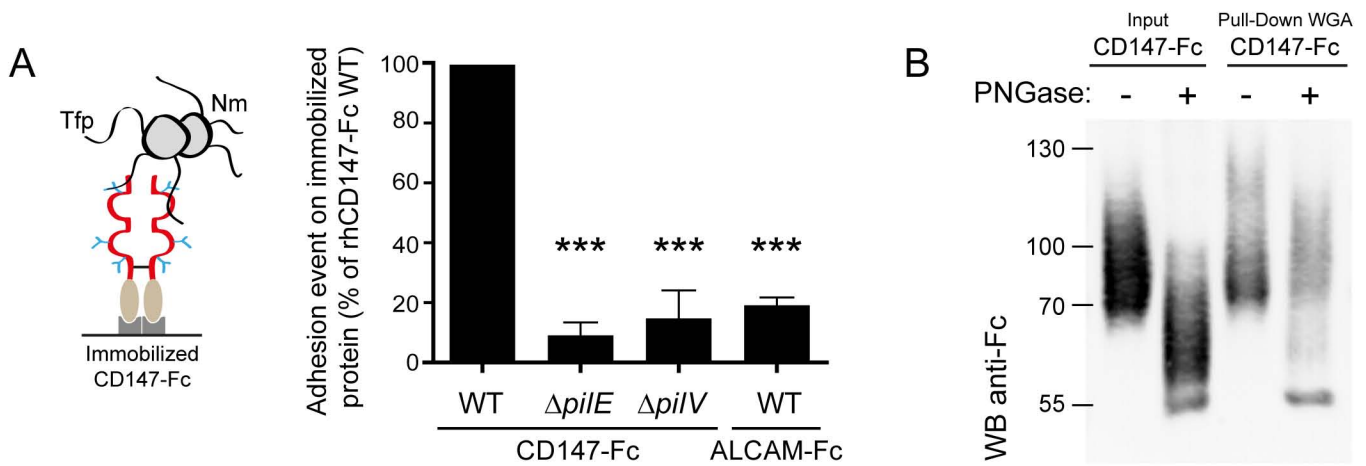

Figure S3:

(A) Adhesion of *N. meningitidis* 2C4.3 wild-type (WT) or  $\Delta pilE$  and  $\Delta pilV$  mutant derivatives to immobilized recombinant human CD147-Fc, or to immobilized recombinant human ALCAM-Fc after 1 hour of infection. Bars represent the percentage of adhesion events in relation to the adhesion of the WT strain on immobilized CD147-Fc \*\*\* :  $p < 0.001$ ; One-way ANOVA.

(B) CD147-Fc recombinant proteins were deglycosylated using PNGase or left in PNGase buffer alone as control before SDS-Page and analyse by western blot.

Supplementary Figure S4

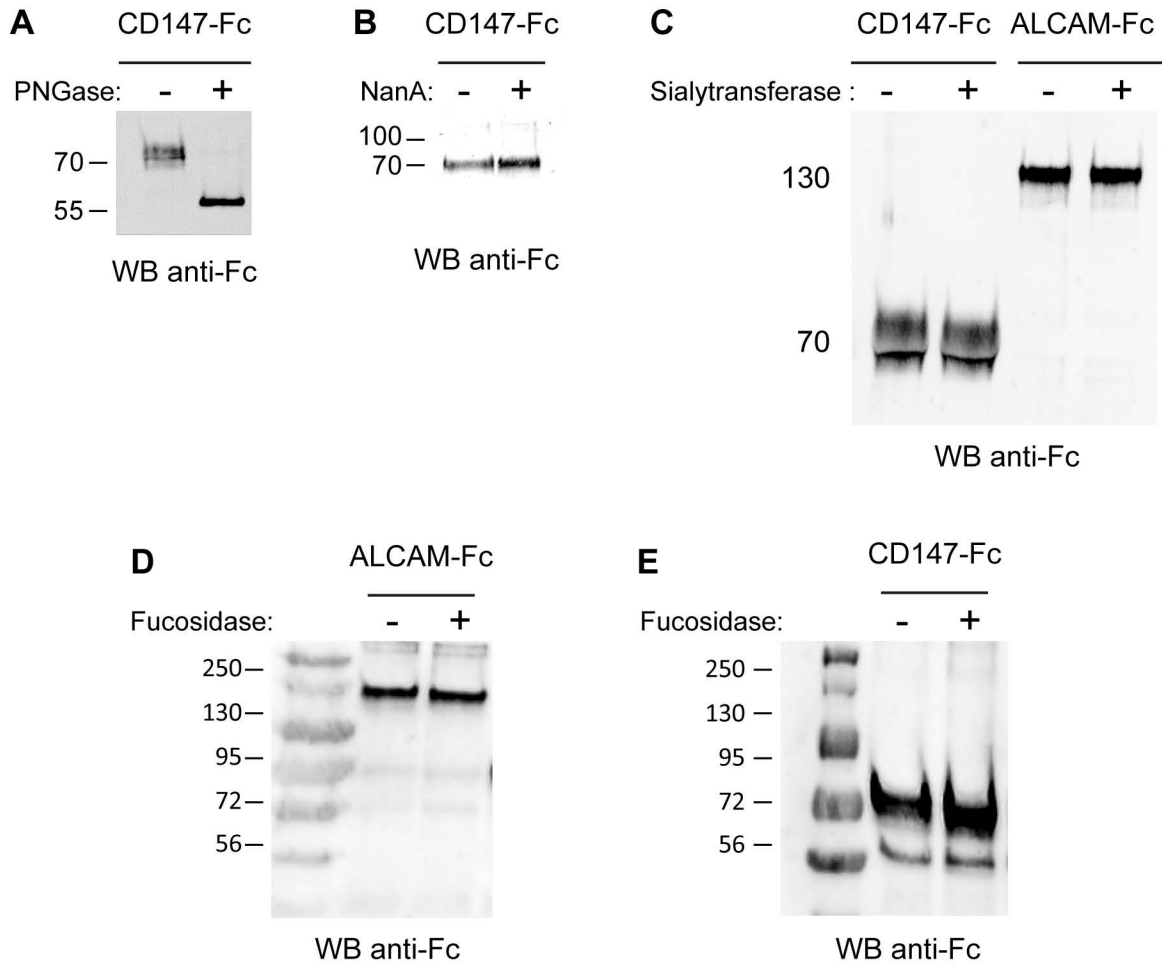

Figure S4:

Native and enzymatically modified recombinants CD147-Fc and ALCAM-Fc were similarly immobilized on slides. CD147-Fc or ALCAM-Fc recombinant proteins were either deglycosylated using PNGase (A), desialylated using NanA (B), sialylated using sialyltransferase (C), or defucosylated using  $\alpha$ -L-fucosidase (D,E) and immobilized on slides. To verify, in each assay, that native and enzymatically modified proteins were similarly immobilized on slides, proteins were collected in Laemmli buffer from a control well and analyzed by western blot using anti-Fc antibody (Jackson). Representative immunoblots are presented.

## Supplementary Figure S5

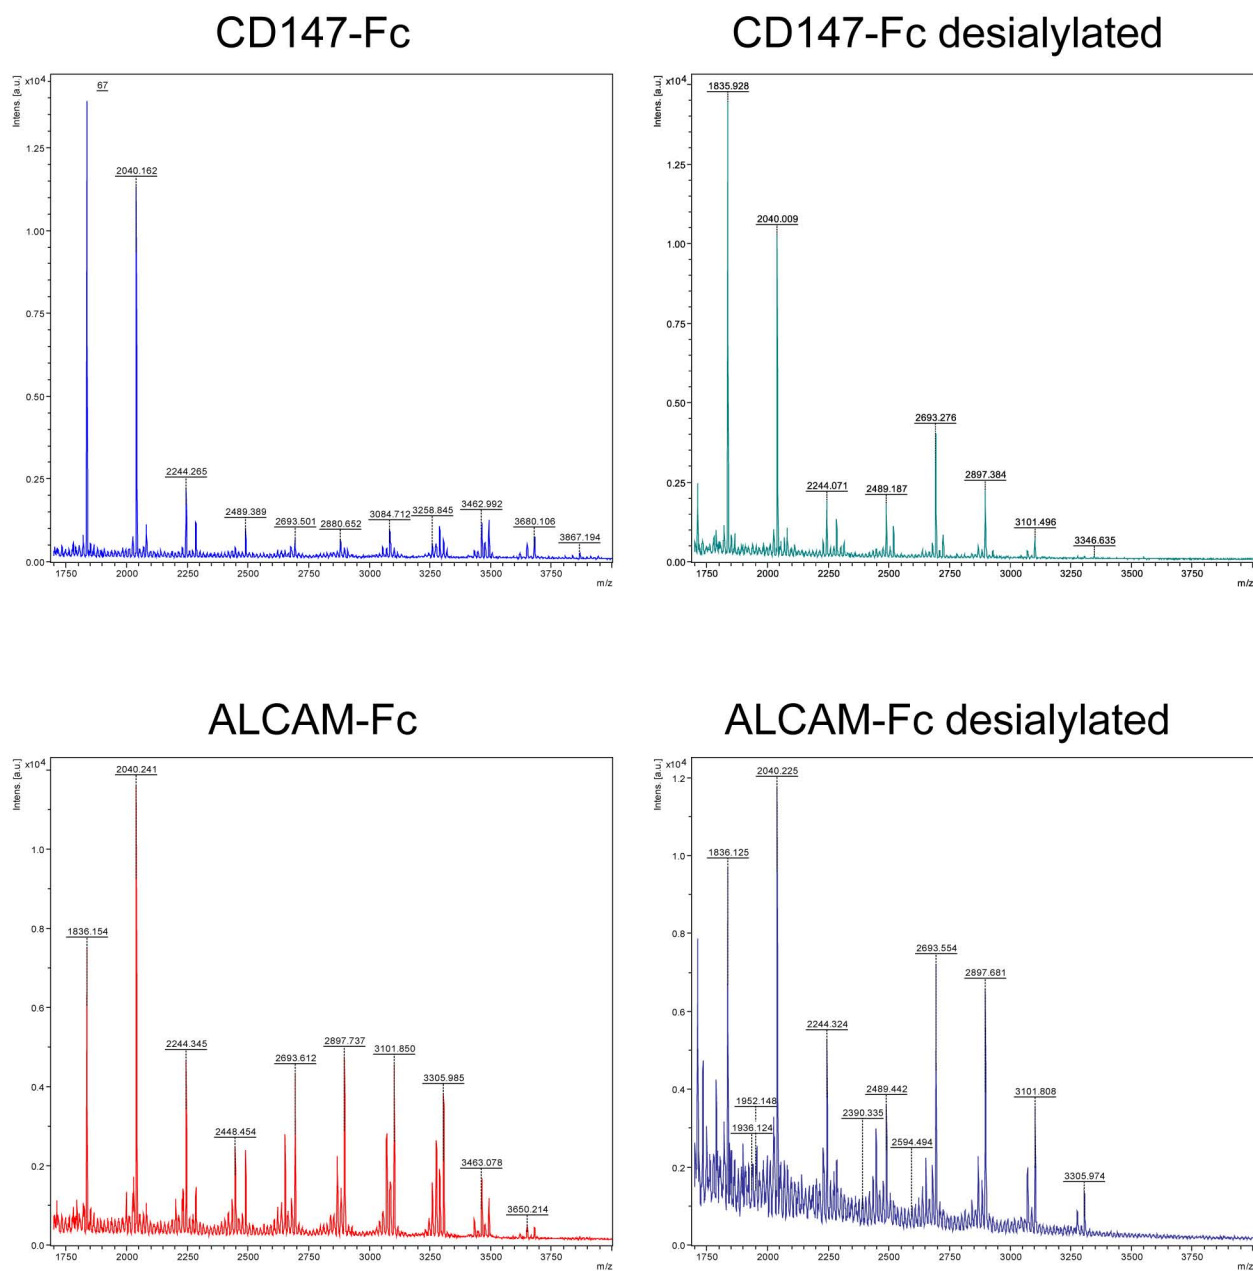

Figure S5:

Laser desorption ionization mass spectrum of desialylated and native recombinant CD147-Fc and ALCAM-Fc. Representative spectra out of 3 independent experiments.

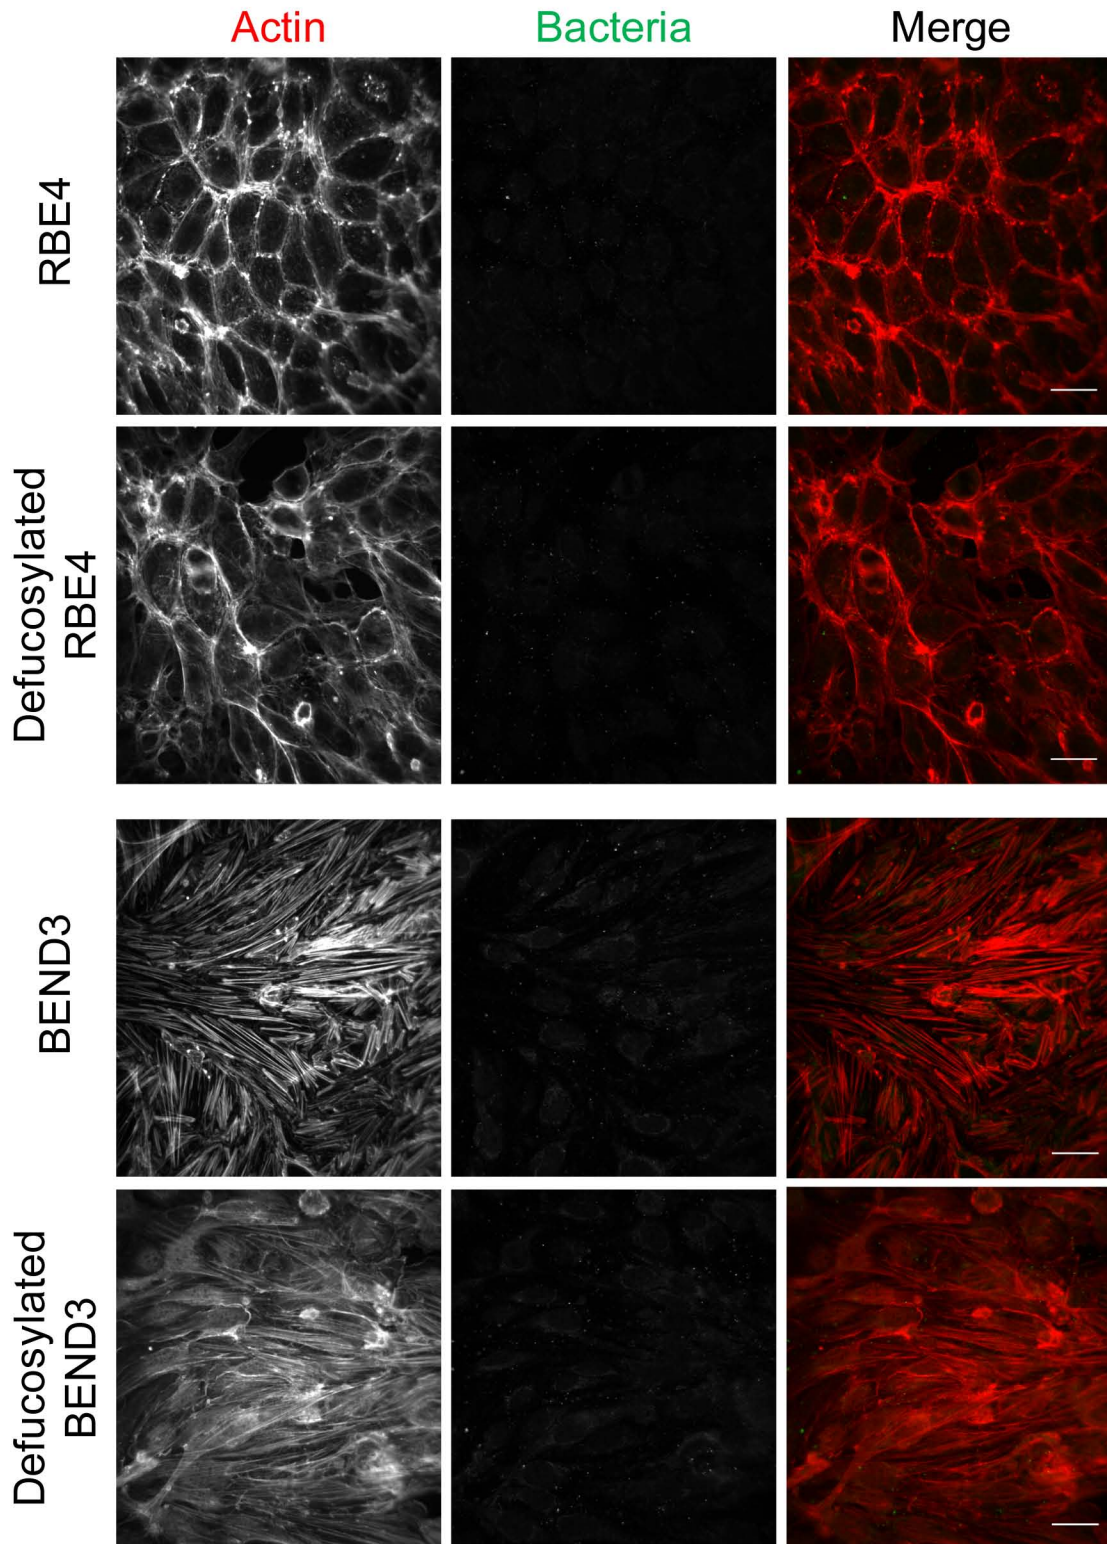

Figure S6:

Brain endothelial cells from mouse (BEND3) and rat (RBE4) origin were treated for 1h with 0.08U/mL human  $\alpha$ -L-fucosidase or vehicle as control. Cells were then gently washed and infected by *N. meningitidis* 2C4.3 for 1h. Cells were fixed and stained for cellular actin (phalloidin) and bacteria (anti-2C4.3) and analysed by confocal microscopy. The images are representative of two independent experiments performed in triplicate (scale bars, 10  $\mu$ m).



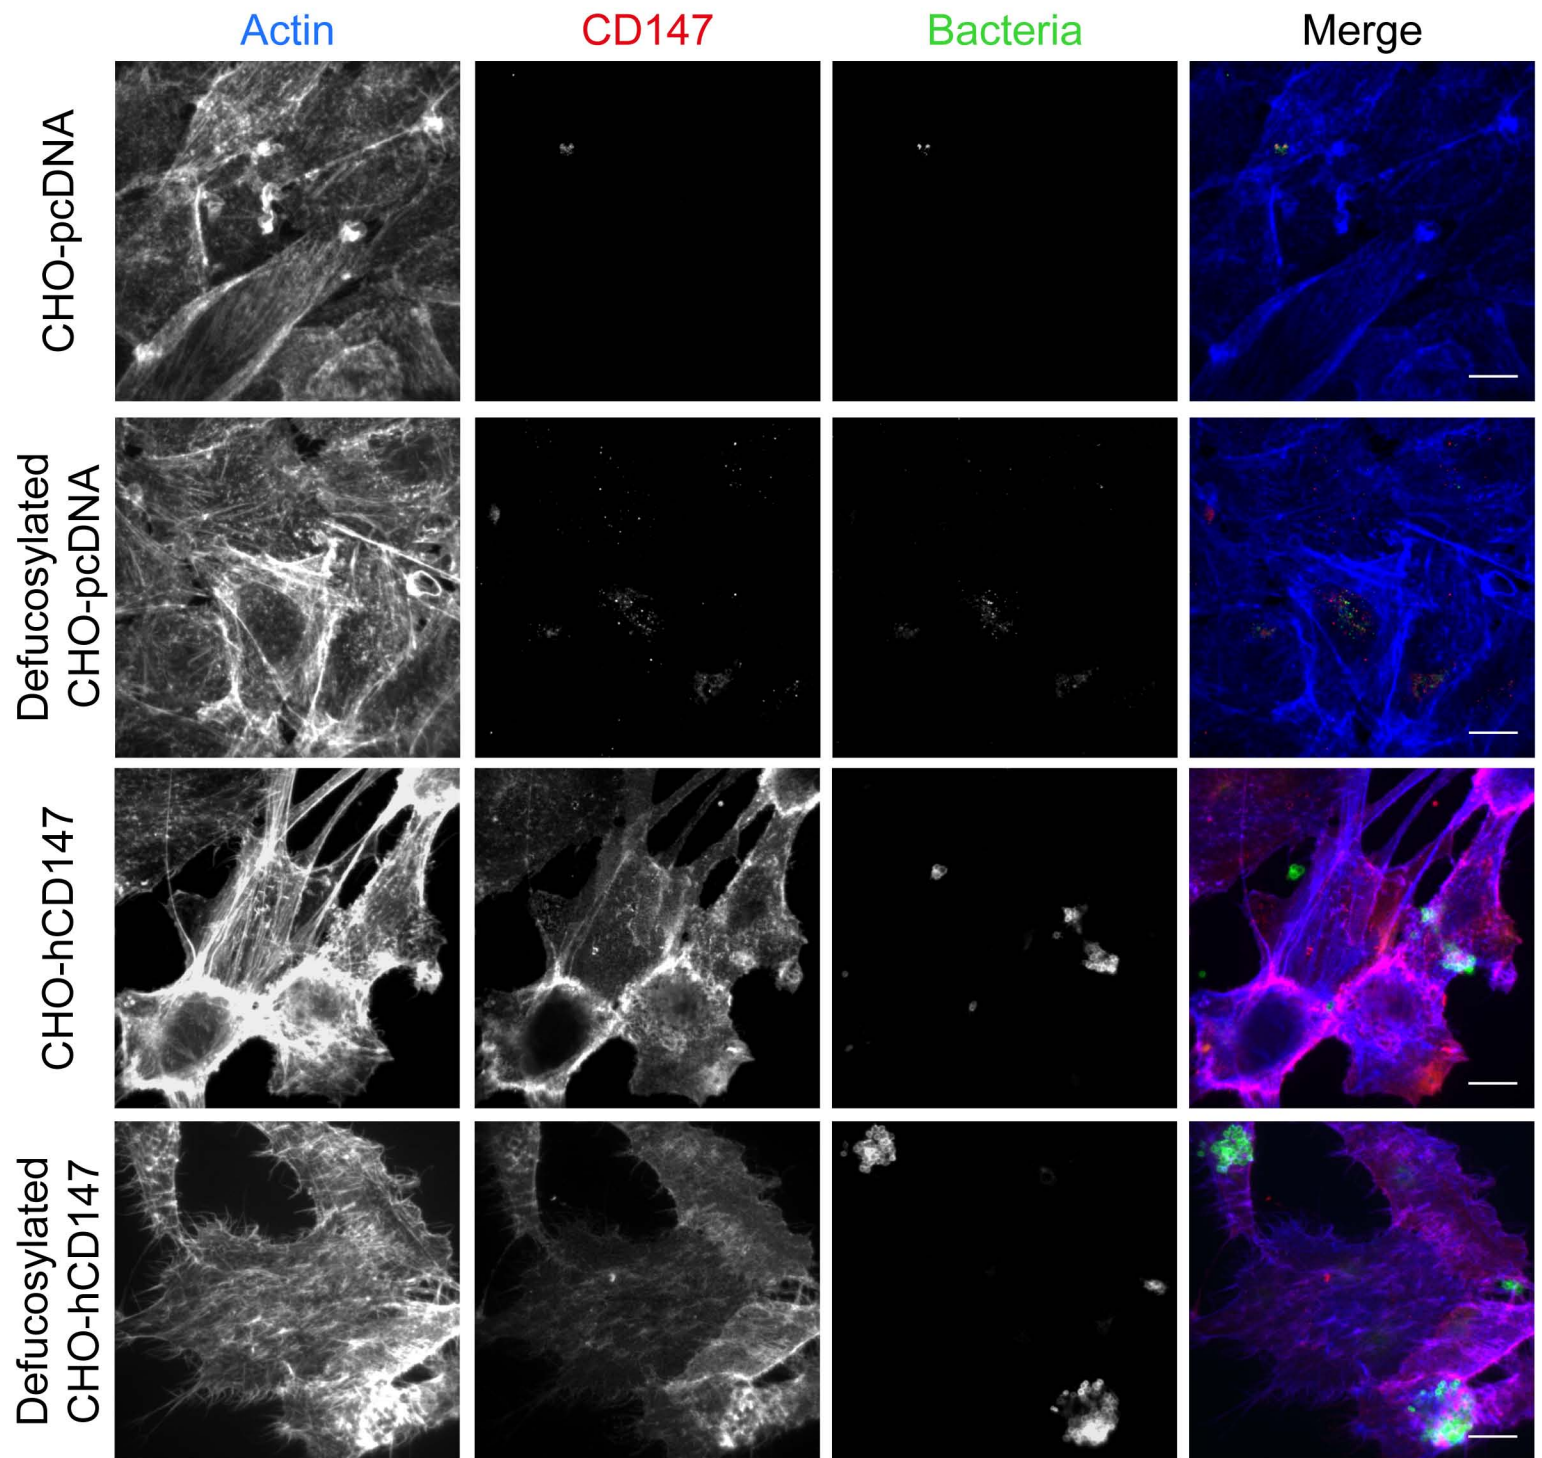

Figure S7:

CHO-pcDNA and CHO-hCD147 cells were treated for 1h with 0.08U/mL human  $\alpha$ -L-fucosidase or vehicle as control. Cells were then gently washed and infected by *N. meningitidis* 2C4.3 for 1h. Cells were fixed and stained for cellular actin (phalloïdin), human Cd147 and bacteria (anti-2C4.3) and analysed by confocal microscopy. The images are representative of three independent experiments performed in triplicate (scale bars, 10 $\mu$ m).

**Table S1**

Inhibitory effect of lectin (20µg/ml) on meningococcal adhesion, determined on the basis of observation.

| Lectins name                                    | Target                                                                | Abbreviations      | Inhibition of adhesion <sup>a</sup> |
|-------------------------------------------------|-----------------------------------------------------------------------|--------------------|-------------------------------------|
| Concanavalin A                                  | D-mannose or D-glucose                                                | ConA               | -                                   |
| <i>Glycine max</i> (soybean) agglutinin         | $\alpha/\beta$ N-acetylgalactosamine                                  | SBA                | -                                   |
| <i>Triticum vulgare</i> (wheat germ) agglutinin | sialic acid and poly N-acetylglucosamine                              | WGA                | ++                                  |
| <i>Dolichos biflorus</i> agglutinin             | $\alpha$ -N-acetylgalactosamine                                       | DBA                | -                                   |
| <i>Ulex europaeus</i> agglutinin 1              | $\alpha$ -L-Fucose ; anti-H blood group specificity                   | UEA 1              | -                                   |
| <i>Ricinus communis</i> agglutinin              | $\beta$ -D-galactosyl residues                                        | RCA <sub>120</sub> | -                                   |
| <i>Arachis hypogaea</i> (peanut) agglutinin     | galactosyl ( $\beta$ -1,3) N-acetylgalactosamine                      | PNA                | -                                   |
| <i>Griffonia simplicifolia</i> lectin I         | terminal $\alpha$ -D-galactose                                        | GSL I              | -                                   |
| <i>Pisum sativum</i> agglutinin                 | terminal $\alpha$ -D-mannose                                          | PSA                | -                                   |
| <i>Lens culinaris</i> agglutinin                | $\alpha$ -D-mannosyl and $\alpha$ -D-glucosyl residues                | LCA                | -                                   |
| <i>Phaseolus vulgaris</i> Erythroagglutinin     | red cell agglutination                                                | PHA-E              | -                                   |
| <i>Phaseolus vulgaris</i> Leucoagglutinin       | lymphocyte agglutination                                              | PHA-I              | -                                   |
| <i>Sophora japonica</i> agglutinin              | $\beta$ -N-acetylgalactosamine                                        | SJA                | -                                   |
| Succinylated wheat germ agglutinin              | N-acetylglucosamine oligomers                                         | sWGA               | -                                   |
| <i>Griffonia simplicifolia</i> lectin II        | $\alpha/\beta$ N-acetylglucosamine                                    | GSL II             | -                                   |
| <i>Datura Stramonium</i> lectin                 | ( $\beta$ -1,4) linked N-acetyl-D-glucosamine oligomers               | DSL                | -                                   |
| <i>Erythrina cristagalli</i> lectin             | D-galactose and D-galactosides                                        | ECL                | -                                   |
| <i>Lycopersicon esculentum</i> (tomato) lectin  | N-acetyl- $\beta$ -D-glucosamine and N-acetyl-D-lactosamine oligomers | LEL                | +                                   |
| <i>Solanum tuberosum</i> lectin                 | N-acetyl- $\beta$ -D-glucosamine and N-acetyl-D-lactosamine oligomers | STL                | +                                   |
| <i>Vicia villosa</i> agglutinin                 | N-acetyl-D-galactosamine                                              | VVA                | -                                   |
| <i>Maackia amurensis</i> lectin                 | Sialic acid ( $\alpha$ 2-3) gal ( $\beta$ -1,4) glcNAc                | MAL I / MAA        | -                                   |
| <i>Maackia amurensis</i> lectin II              | Sialic acid ( $\alpha$ 2-3) N-acetyl-galactosamine                    | MAL II / MAH       | -                                   |
| <i>Sambucus nigra</i> bark lectin               | Sialic acid ( $\alpha$ 2-6) gal ( $\beta$ -1,4) glcNAc                | SNA                | -                                   |

(a) ++ : strong inhibitory effect ; + : inhibitory effect ; - : no effect.

Sources: [www.vectorslabs.com](http://www.vectorslabs.com) and [www.sigmaaldrich.com](http://www.sigmaaldrich.com)

**Table S2: Matrix-assisted laser desorption/ionization mass spectrometry analysis of recombinant CD147-Fc and ALCAM-Fc**

Structure of untreated and desialylated recombinant CD147-Fc and ALCAM-Fc and defucosylated ALCAM-Fc. Expressed as percentage of the total ion population.

| Mass | Core fucosylated                                                                    | Fucosylated on GlcNAc                                                               | No Fucose                                                                             | CD147-Fc | CD147-Fc desialylated | ALCAM-Fc | ALCAM-Fc desialylated | ALCAM-Fc defucosylated |
|------|-------------------------------------------------------------------------------------|-------------------------------------------------------------------------------------|---------------------------------------------------------------------------------------|----------|-----------------------|----------|-----------------------|------------------------|
| 1794 | 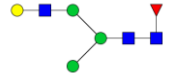   |    |                                                                                       | 0%       | 0%                    | 1.9%     | 0%                    | 0%                     |
| 1835 |    |    |                                                                                       | 35.9     | 37.9                  | 12.7     | 14.9                  | 12.9                   |
| 1865 |                                                                                     |                                                                                     |    | 0.9      | 1.7                   | 0        | 0                     | 0                      |
| 1998 |    |                                                                                     |                                                                                       | 0        | 0                     | 1.8      | 0                     | 5.6                    |
| 2040 |   |   |                                                                                       | 28       | 26                    | 19.5     | 21.4                  | 13.4                   |
| 2070 |                                                                                     |                                                                                     |  | 0.7      | 1.3                   | 0        | 2.7                   | 0                      |
| 2081 |  |  |                                                                                       | 2.1      | 1.9                   | 1.2      | 0                     | 0                      |
| 2244 |  |  |                                                                                       | 5        | 3.9                   | 7.1      | 8.4                   | 8.9                    |

|      |                                                                                      |     |     |     |     |     |
|------|--------------------------------------------------------------------------------------|-----|-----|-----|-----|-----|
| 2285 | 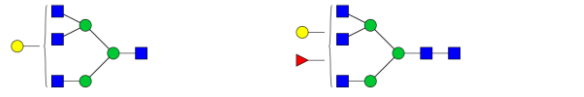   | 2.1 | 2.6 | 1.8 | 3   | 2.6 |
| 2315 |   | 0   | 1.2 | 0   | 0   | 0   |
| 2418 |    | 0.7 | 0   | 1.2 | 2.1 | 0   |
| 2448 |    | 1   | 0.8 | 3.6 | 4.7 | 5.8 |
| 2489 |    | 2.1 | 3.5 | 2.8 | 5.3 | 5.5 |
| 2519 |   | 0   | 2   | 0   | 0   | 0   |
| 2622 |    | 0   | 0   | 1.4 | 1.9 | 0   |
| 2652 |  | 0.8 | 0.5 | 3.8 | 3.4 | 4.1 |
| 2676 |  | 0.8 | 0   | 0   | 0   | 0   |
| 2693 |  | 1.3 | 7.5 | 5.7 | 9.9 | 9.2 |



|             |  |            |          |          |          |            |
|-------------|--|------------|----------|----------|----------|------------|
| 2723        |  | 0          | 1.4      | 0        | 1.4      | 0          |
| 2867        |  | 0          | 0.9      | 2.8      | 3        | 0          |
| 2880        |  | 1.1        | 0        | 1.2      | 0        | 0          |
| 2897        |  | 0.8        | 3.9      | 6        | 8.7      | 10.9       |
| 2927        |  | 0          | 0.7      | 0        | 0        | 0          |
| 3054        |  | 0.7        | 0        | 0        | 0        | 0          |
| 3071        |  | 0.7        | 0.6      | 3.4      | 2.3      | 0          |
| <b>3084</b> |  | <b>1.5</b> | <b>0</b> | <b>0</b> | <b>0</b> | <b>1.7</b> |
| 3101        |  | 0.8        | 1.3      | 5.4      | 4.3      | 8.8        |

|      |  |     |     |     |     |     |
|------|--|-----|-----|-----|-----|-----|
| 3114 |  | 0.5 | 0   | 0   | 0   | 0   |
| 3245 |  | 0   | 0   | 0.8 | 0   | 0   |
| 3258 |  | 1   | 0   | 1.6 | 0   | 1.1 |
| 3275 |  | 0   | 0   | 2.8 | 1.1 | 0   |
| 3288 |  | 1.7 | 0   | 1.8 | 0   | 2   |
| 3305 |  | 1   | 0   | 4.4 | 1.5 | 5.8 |
| 3318 |  | 0.6 | 0   | 0   | 0   | 0   |
| 3346 |  | 0   | 0.3 | 0   | 0   | 0   |

|      |  |     |   |     |   |     |
|------|--|-----|---|-----|---|-----|
| 3432 |  | 0.5 | 0 | 0.8 | 0 | 0   |
| 3462 |  | 1.9 | 0 | 1.8 | 0 | 0.8 |
| 3475 |  | 0.8 | 0 | 0.5 | 0 | 0   |
| 3492 |  | 1.8 | 0 | 1.2 | 0 | 1   |
| 3505 |  | 0.5 | 0 | 0   | 0 | 0   |
| 3619 |  | 0.4 | 0 | 0   | 0 | 0   |
| 3649 |  | 0.9 | 0 | 0.5 | 0 | 0   |

|      |  |            |                   |
|------|--|------------|-------------------|
| 3679 |  | 1.1      0 | 0.5      0      0 |
|------|--|------------|-------------------|

Glycan symbols and colour coding as recommended by the Consortium for Functional Glycomics: ■ GlcNAc; ● Man; ● Gal; ▲ Fuc; ◆ Neu5Ac; ◇ Neu5Gc

**Table S3:** Amino-acid sequence alignment of the human, rat, mouse and chinese hamster CD147/Basigin homologues

|                        |                                                                                       |     |
|------------------------|---------------------------------------------------------------------------------------|-----|
| SP P35613 BASI_HUMAN   | MAAALFVLLGFALLGTHGASGAAGFVQAPLSQQRWVGGSVLHCEAVGSPVPEIQWVFEG                           | 60  |
| SP P26453 BASI_RAT     | MAAALLLALAFITLLSGQGACAAAGFLKAPMSQEQWAGGSVVLHCEAVGSPMPEIQWVFEG                         | 60  |
| SP P18572 BASI_MOUSE   | MAAALLLALAFITLLSGQGACAAAGFLKAPLSQERWAGGSVVLHCEAVGSPVPEIQWVFEG                         | 60  |
| SP Q99PA3 BASI_HAMSTER | RAAALLLALGFALLCGQGACAAA-----                                                          |     |
| SP P35613 BASI_HUMAN   | QCPNDTCSQLWDGARLDRVHIHATYHQHAASTISIDTIVEEDTCTYECRASNDPDRNHLT                          | 120 |
| SP P26453 BASI_RAT     | NEPNDSCSQLWDGARLDRVHIHATYRQHAASTLSVDGLAAEDTGTYECRASDDPDRNHLT                          | 120 |
| SP P18572 BASI_MOUSE   | NAPNDSCSQLWDGARLDRVHIHAAYRQHAASLSVDGLTAEDTGTYECRASDDPDRNHLT                           | 120 |
| SP Q99PA3 BASI_HAMSTER | -----                                                                                 |     |
| SP P35613 BASI_HUMAN   | RAPRVKWRVRAQAVVLEPGTVFTTVEVLDGSKILLT <b>C</b> SL <b>N</b> DSATEVTGHRWLKGGVVLKE        | 180 |
| SP P26453 BASI_RAT     | RPPRVKWRVRAQASVVVLEPGTIVTSVQEVDSKTQLT <b>C</b> FL <b>N</b> SSGIDIVGHRWMRGGKVLQE       | 180 |
| SP P18572 BASI_MOUSE   | RPPRVKWRVRAQASVVVLEPGTIQTSVQEVNSKTQLT <b>C</b> SL <b>N</b> SSGVDIVGHRWMRGGKVLQE       | 180 |
| SP Q99PA3 BASI_HAMSTER | -----AAGTTIQTSVNDVGSKTHLT <b>C</b> SL <b>N</b> SSGVDIIGHRWMRGGKILQE                   | 89  |
|                        | *:*:*:*:*:*:*:*:*:*:*:*:*:*:*:*:*:*:*:*:*:*:*:*:*:*:*:*:*:*:*:*:*:*:*                 |     |
| SP P35613 BASI_HUMAN   | DALPGQKTEFKVDSDDQWGEYS <b>C</b> IFLPEPMGTANIQLHGFPPRVKAVKSSSEHINEGETAML               | 240 |
| SP P26453 BASI_RAT     | DTLPDLQMKYTVDADDRSGEYS <b>C</b> IFLPEPVGRGNINVEGPPRIKVGKKSEHASEGEFVKL                 | 240 |
| SP P18572 BASI_MOUSE   | DTLPDLHTKYIVDADDRSGEYS <b>C</b> IFLPEPVGRSEINVEGPPRIKVGKKSEHSEGEELAKL                 | 240 |
| SP Q99PA3 BASI_HAMSTER | DTLPDLQTYTVDIDDRSGDYA <b>C</b> IFLPEPVGRSNIVVEGPPRIKVGKKSEHSEGENVRL                   | 149 |
|                        | *:*:*:*:*:*:*:*:*:*:*:*:*:*:*:*:*:*:*:*:*:*:*:*:*:*:*:*:*:*:*:*:*:*                   |     |
| SP P35613 BASI_HUMAN   | <b>V</b> CKSE-SVPPVTDWAWYKITDSEDKALM <b>N</b> ---GSESRRFFVSSSQGRSELHIENLNMEADP        | 296 |
| SP P26453 BASI_RAT     | <b>I</b> CKSEASHPPVDWVWFKTSDTGQD-TIS <b>N</b> CGTEANSKYVLIISTPELSELIISDLDNVDP         | 299 |
| SP P18572 BASI_MOUSE   | <b>V</b> CKSDASYPPITDWFVKTSDTGEBEAI <b>T</b> NSTEANGKYVVVSTPEKSQLTISNLDNVDP           | 300 |
| SP Q99PA3 BASI_HAMSTER | <b>I</b> CKSESSHPVTEWSWFKTSDSGDQ <b>LIT-N</b> --SSESKYVVI <b>STADR</b> SELTISNLDINSDP | 206 |
|                        | *:*:*:*:*:*:*:*:*:*:*:*:*:*:*:*:*:*:*:*:*:*:*:*:*:*:*:*:*:*:*:*:*                     |     |
| SP P35613 BASI_HUMAN   | GQYR <b>C</b> NGTSSKGSQAIITLVRVSHLALWPFGLGIVAEVLVLTIIIFIYKRRKPEDVLD                   | 356 |
| SP P26453 BASI_RAT     | GTYV <b>C</b> NATNSQGSARETISLRVRSRLAALWPFGLGIVAEVLVLTIIIFIYKRRKPDQTL                  | 359 |
| SP P18572 BASI_MOUSE   | GTYV <b>C</b> NATNAQGTRETISLRVRSRMAALWPFGLGIVAEVLVLTIIIFIYKRRKPDQTL                   | 360 |
| SP Q99PA3 BASI_HAMSTER | GTYM <b>C</b> NATNTQGSVQEIMTLRVRSLAALWPFGLGIVAEVLVLTIIIFIYKRRKPDQTL                   | 266 |
|                        | * * * * * : * : * : * : * : * : * : * : * : * : * : * : * : * : * : * : * : *         |     |
| SP P35613 BASI_HUMAN   | DDDAGSAPLKSSGQHNDKGNVRQRNSS                                                           | 385 |
| SP P26453 BASI_RAT     | EDDPGAAPLKSGSHLNDKDNVRQRNAT                                                           | 388 |
| SP P18572 BASI_MOUSE   | EDDPGAAPLKSGSHTMNDKDNVRQRNAT                                                          | 389 |
| SP Q99PA3 BASI_HAMSTER | EDDPGAAPLKSGSHMNDKDNVRQRNAT                                                           | 295 |
|                        | :*:*:*:*:*:*:*:*:*:*:*:*:*:*:*:*:*:*:*:*:*:*:*:*:*:*:*:*:*:*:*:*                      |     |

**C** Cysteine engaged in disulfide bonds

**N** N-glycosylation sites

\* conserved residue

. conservation between groups of weakly similar properties

: conservation between groups of strongly similar properties

**Table S4:** Primers used in this study

---

**To introduce the HA tag into pcDNA3-CD147 vector:**

CD147-HA Forward: 5' GTTCCAGATTACGCTTGAGGCAGGTGGCCCGAGGACG 3'

CD147-HA Reverse: 5' ATCGTATGGGTAGGAAGAGTTCCTCTGGCCG 3'

**To delete the D1 domain of CD147:**

CD147-del-D1 Forward: 5' CACGGCCTCCCAGAGTGAAGGCTGTG 3'

CD147-del-D1 Reverse: 5' CCCGGAGGCTCCGTGGGTGCCAGCAGC 3'

**To delete the D2 domain of CD147:**

CD147-del-D2 Forward: 5' CTCCGCGTGCGCAGCCACCTGGCCG 3'

CD147-del-D2 Reverse: 5' TCTGGGAGGCCCGTGGAGCTGGATGTTGG 3'

**To delete glycosylation site 1 of CD147 domain 1:**

D1-del-N1 Forward: 5' GCCGACAGCGCCACAGAGGTC 3'

D1-del-N1 Reverse: 5' CAAGGAGCAGGTGAGGAG 3'

**To delete glycosylation site 1 of domain 2:**

D2-del-N1 Forward: 5'GCCGGCTCCGAGAGCAGGTTC 3'

D2-del-N1 Reverse: 5' CATGAGGGCCTTGCCTC 3'

**To delete glycosylation site2 of domain 2:**

D2-del-N2 Forward: 5' GCCGGCACCAGCTCCAAGGGC 3'

D2-del-N2 Reverse: 5' GCACCGTACTGGCCGGG 3'

---

**Table S5:** Antibodies used in this study

| <i>Target</i>                | <i>Reference</i> | <i>Provider</i>        | <i>Condition of use</i> |
|------------------------------|------------------|------------------------|-------------------------|
| <b>Primary Antibodies</b>    |                  |                        |                         |
| hCD147 (Basigin)             | MEM-M6/1         | AbD Serotec            | IF= 1/100               |
| hCD147 (Basigin)             | MEM-M6/6         | AbD Serotec            | IF= 1/100               |
| HA                           | 12CA5            | Roche                  | IF= 1/100               |
| hIgG Fc                      | 109-005-098      | Jackson                | WB=1/100                |
| Clathrin                     | 610500           | BD transduction Lab    | WB 1/1000               |
| Ezrin                        | Serum            | Dr Paul Mangeat        | IF= 1/1000              |
| <i>N. meningitidis</i> 2C4.3 | Serum            | Dr Xavier Nassif       | IF= 1/1000              |
| DAPI                         | D9542            | Sigma Aldrich          | 300nM                   |
| Rhodamine-phalloidin         | P1951            | Sigma Aldrich          | IF= 1/200               |
| <b>Secondary antibodies</b>  |                  |                        |                         |
| Goat Anti-Mouse CY3          | 115-165-146      | Jackson ImmunoResearch | IF= 1/500               |
| Goat Anti-Mouse CY5          | 115-175-146      | Jackson ImmunoResearch | IF= 1/500               |
| Goat Anti-Rabbit CY3         | 111-165-144      | Jackson ImmunoResearch | IF= 1/500               |
| Goat Anti-Rabbit CY5         | 111-175-144      | Jackson ImmunoResearch | IF= 1/500               |
